# Supplementary material for: Inhibition of hornification in simao pine fibers and recycled paper with different beating degrees by microwave expansion treatment
Source: publisher site journal article supplement (doi:10.1515/npprj-2025-0025), 2025-08-12
Supplement: Supplementary file 1 [file j_npprj-2025-0025_suppl_001.docx]

Supporting information

Inhibition of Hornification in Simao Pine Fibers and Recycled Paper with Different Beating Degrees by Microwave Expansion Treatment

Zinuo Meng, Jizhen Huang*, Liangliang An, Changrong Shi, Ya Zhang, Wanruo Lei, Yuxin Liu*

Faculty of Chemical Engineering, Kunming University of Science and Technology, Kunming, Yunnan 650500, China

*Corresponding Author:

Jizhen Huang, E-mail: huangjizhen211@163.com; Yuxin Liu, E-mail: yuxinliukm@kmust.edu.cn.

Number of pages: 2

Number of figures: 3


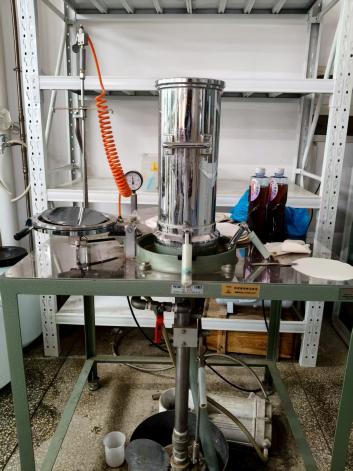
Figure S1. A physical image of the sheet former


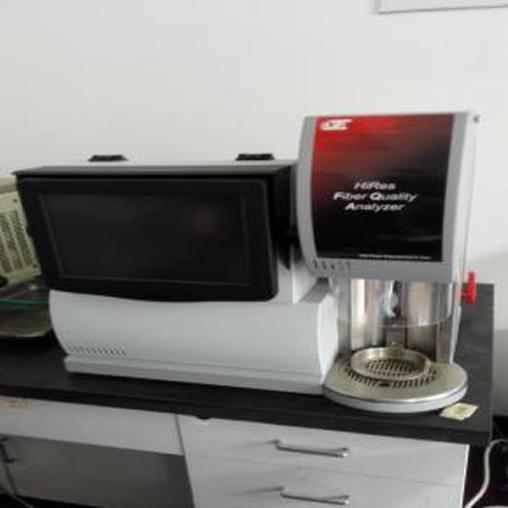
Figure S2. Physical image of fiber quality analyzer


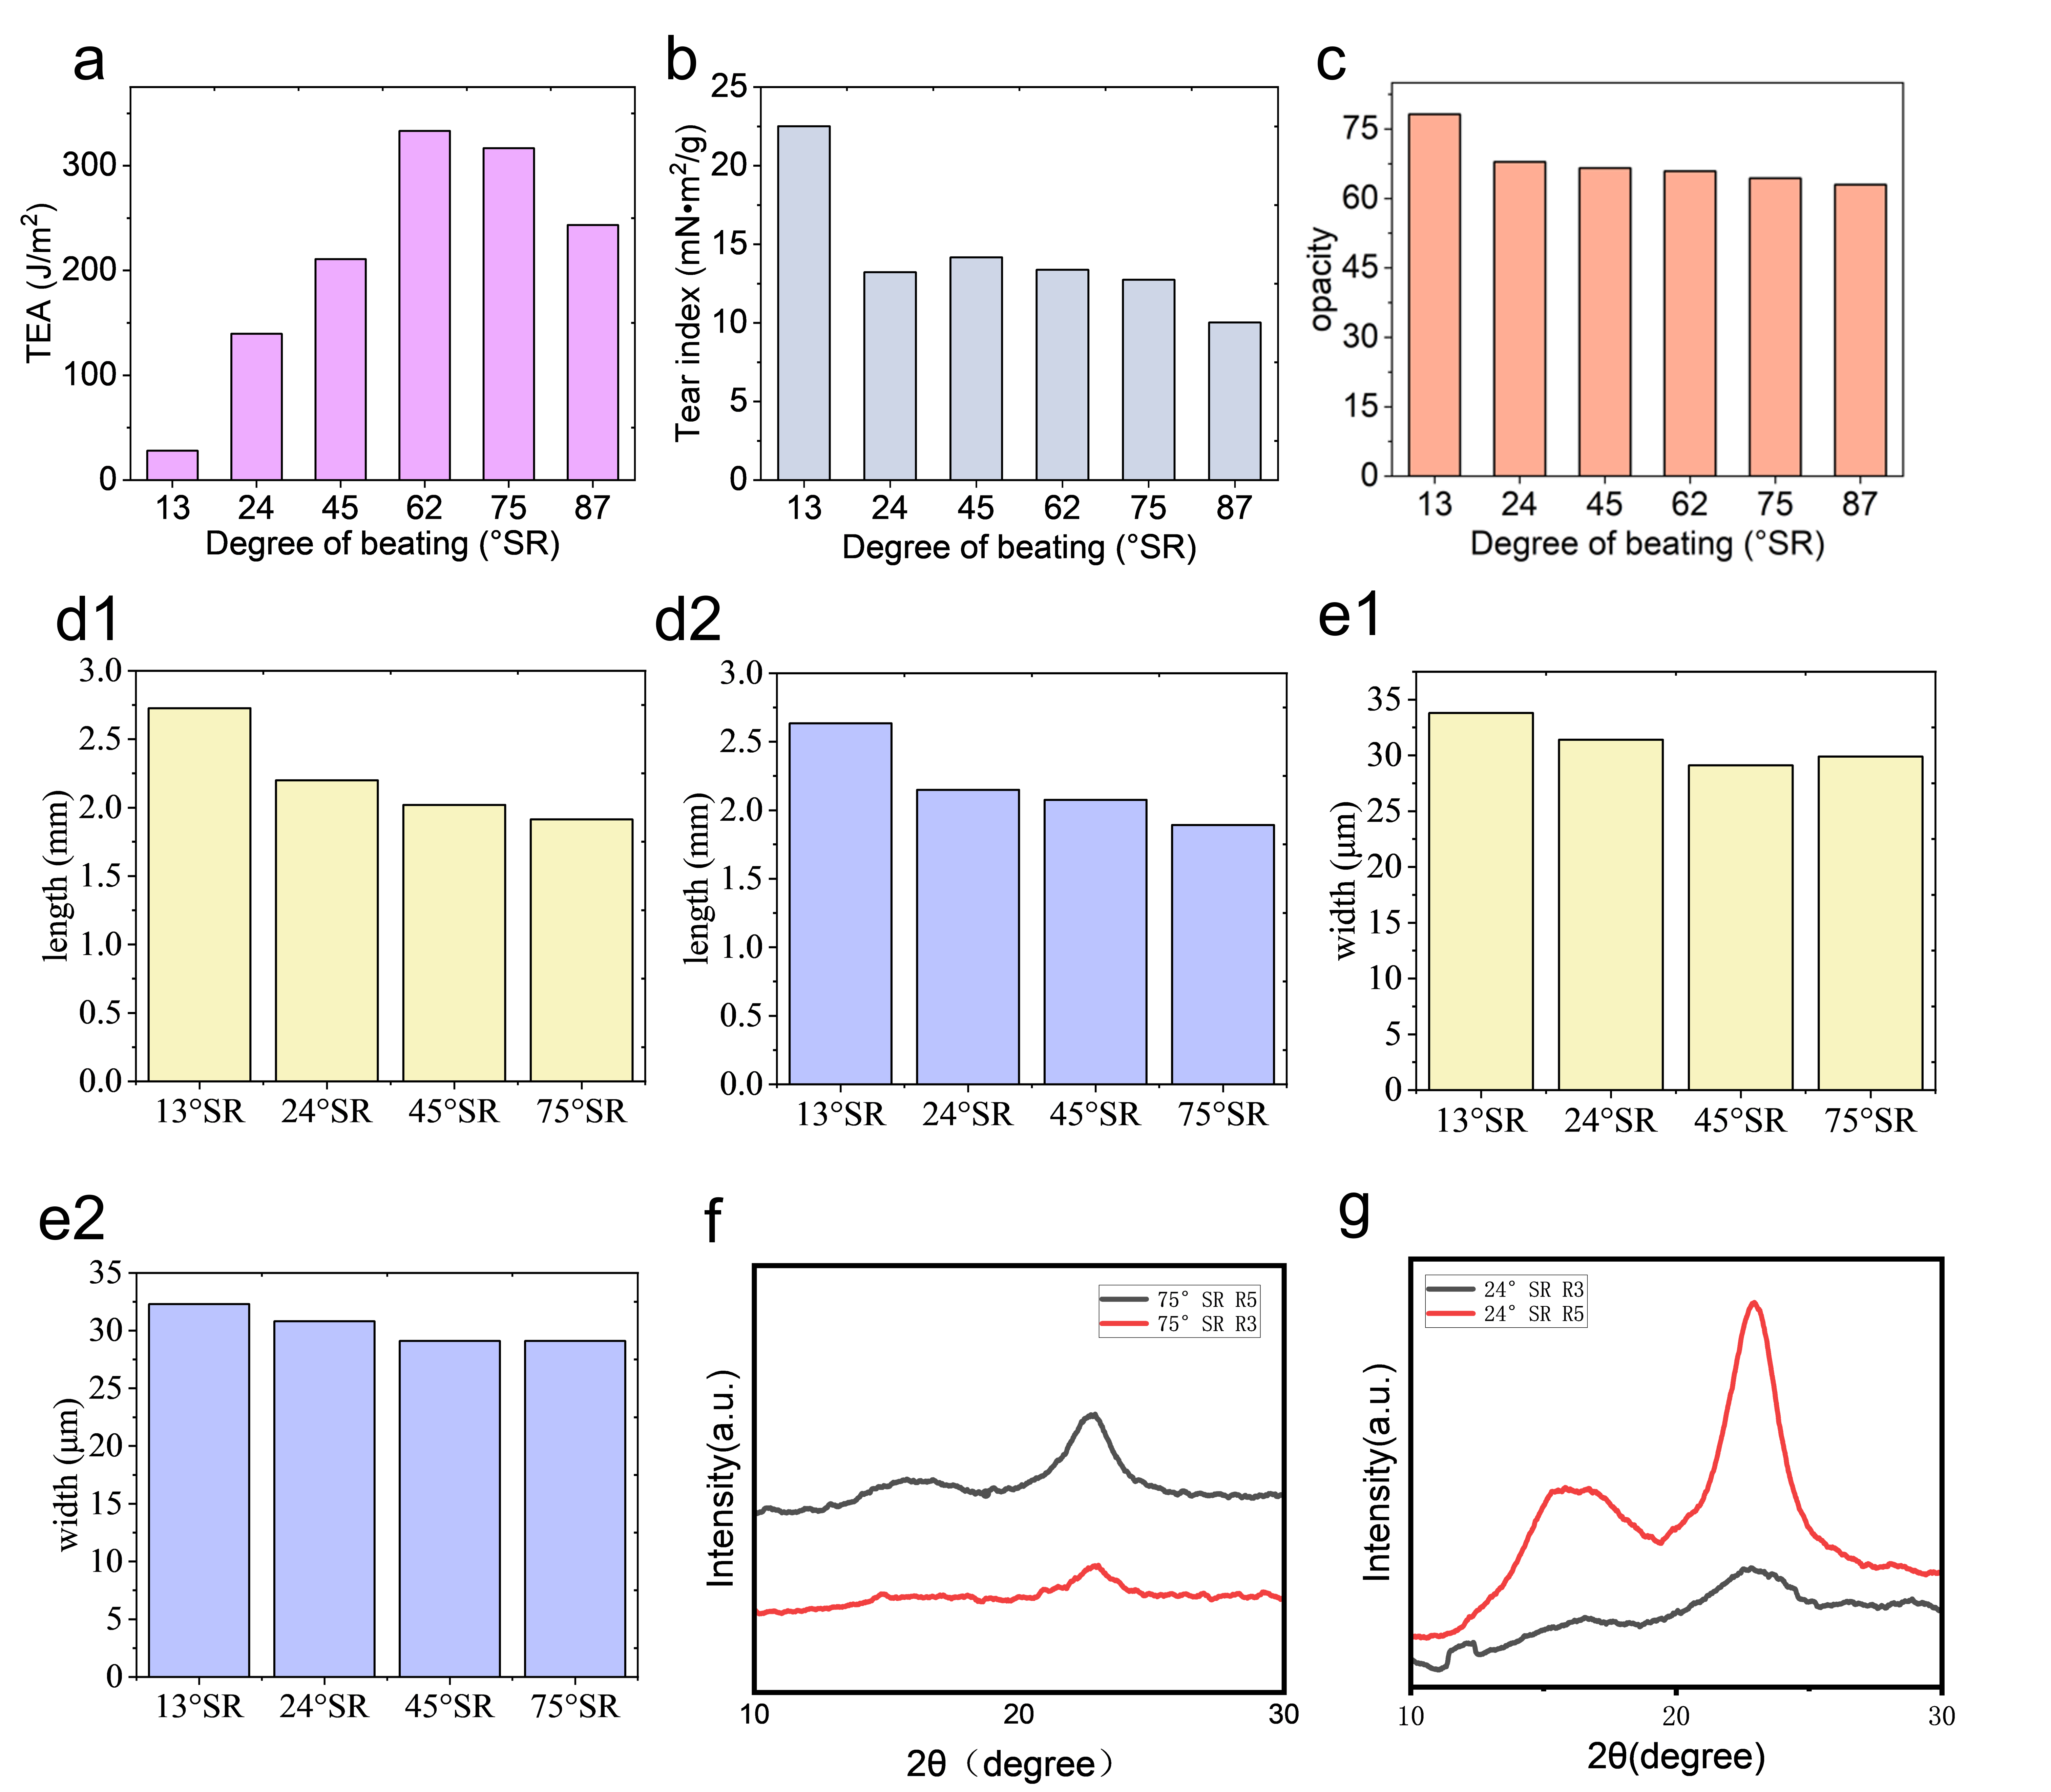


Figure S3. TEA (a), Tear index (b), Opacity (c) of different beating degrees paper. tensile length (d), width ratio (e) of recycled fibers after secondary microwave puffing. 75°SR crystallinity (f), 24°SR crystallinity (g)
